# Supplementary material
Source: Springer Nature journal article supplement (https://www.springerprofessional.de/resource/supplementary/13174_2013_4_MOESM3_ESM.pdf/10784748)

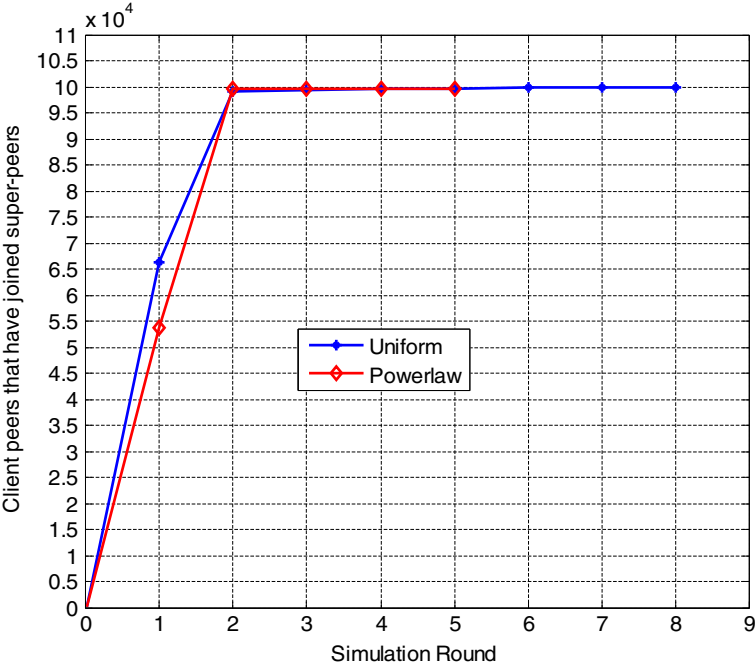

Supplement: MOESM3 [file 10784748]
